# Supplementary material for: Using qualitative comparative analysis and theory of change to unravel the effects of a mental health intervention on service utilisation in Nepal
Source: PubMed Central journal article supplement — BMJ Glob Health. 2018 Dec 30;3(6):e001023. doi: 10.1136/bmjgh-2018-001023 (PMC6326347; doi:10.1136/bmjgh-2018-001023), 2018-12-30
Supplement: bmjgh-2018-001023supp002.pdf [file bmjgh-2018-001023supp002.pdf]

| Facility Number | Quarter | Primary care service utilisation for mental illness | Medication supply | Supervision (facility) | Supervision (community) | Trained human resources (facility) | Trained human resources (community) | Facility psychosocial interventions | mhGAP | Referral to tertiary care | Community identification | Community awareness and stigma reduction |
|-----------------|---------|-----------------------------------------------------|-------------------|------------------------|-------------------------|------------------------------------|-------------------------------------|-------------------------------------|-------|---------------------------|--------------------------|------------------------------------------|
| 1               | 3       | 0.10                                                | 0.00              | 0.00                   | 0.00                    | 0.05                               | 0                                   | 0.00                                | 0.00  | 1.00                      | 0.00                     | 0.05                                     |
| 1               | 9       | 0.09                                                | 0.00              | 0.00                   | 0.00                    | 0.95                               | 0                                   | 0.67                                | 0.00  | 1.00                      | 0.00                     | 0.05                                     |
| 1               | 12      | 0.30                                                | 0.83              | 0.50                   | 0.00                    | 0.95                               | 1                                   | 1.00                                | 0.00  | 1.00                      | 0.94                     | 0.14                                     |
| 1               | 16      | 0.19                                                | 1.00              | 1.00                   | 1.00                    | 0.95                               | 1                                   | 1.00                                | 1.00  | 1.00                      | 0.89                     | 0.60                                     |
| 1               | 22      | 1.00                                                | 1.00              | 1.00                   | 1.00                    | 0.95                               | 1                                   | 1.00                                | 1.00  | 1.00                      | 0.74                     | 0.62                                     |
| 1               | 25      | 0.99                                                | 1.00              | 0.67                   | 1.00                    | 0.95                               | 1                                   | 1.00                                | 1.00  | 1.00                      | 0.00                     | 0.62                                     |
| 1               | 29      | 0.99                                                | 0.63              | 0.33                   | 0.50                    | 0.99                               | 1                                   | 1.00                                | 1.00  | 1.00                      | 0.00                     | 0.62                                     |
| 1               | 32      | 1.00                                                | 0.79              | 0.17                   | 0.17                    | 0.99                               | 1                                   | 1.00                                | 1.00  | 1.00                      | 0.34                     | 0.62                                     |
| 1               | 35      | 0.82                                                | 0.83              | 0.33                   | 0.17                    | 0.99                               | 1                                   | 1.00                                | 1.00  | 1.00                      | 0.34                     | 0.62                                     |
| 1               | 38      | 0.96                                                | 0.83              | 1.00                   | 0.17                    | 0.99                               | 1                                   | 1.00                                | 1.00  | 1.00                      | 0.59                     | 0.62                                     |
| 2               | 3       | 0.07                                                | 0.00              | 0.00                   | 0.00                    | 0.05                               | 0                                   | 0.00                                | 0.00  | 0.00                      | 0.00                     | 0.05                                     |
| 2               | 9       | 0.00                                                | 0.00              | 0.00                   | 0.00                    | 1.00                               | 0                                   | 0.00                                | 0.00  | 1.00                      | 0.00                     | 0.05                                     |
| 2               | 12      | 0.68                                                | 1.00              | 0.00                   | 0.00                    | 1.00                               | 1                                   | 1.00                                | 1.00  | 1.00                      | 0.59                     | 0.05                                     |
| 2               | 16      | 0.96                                                | 1.00              | 1.00                   | 0.67                    | 0.55                               | 1                                   | 1.00                                | 1.00  | 1.00                      | 0.80                     | 0.88                                     |
| 2               | 22      | 0.82                                                | 1.00              | 1.00                   | 1.00                    | 0.55                               | 1                                   | 1.00                                | 1.00  | 1.00                      | 0.59                     | 0.89                                     |
| 2               | 25      | 0.67                                                | 0.75              | 0.67                   | 1.00                    | 0.55                               | 1                                   | 1.00                                | 1.00  | 1.00                      | 0.45                     | 0.89                                     |
| 2               | 29      | 0.59                                                | 0.83              | 0.33                   | 0.50                    | 0.55                               | 1                                   | 0.89                                | 1.00  | 1.00                      | 0.45                     | 0.89                                     |
| 2               | 32      | 0.90                                                | 0.58              | 0.17                   | 0.17                    | 0.95                               | 1                                   | 1.00                                | 1.00  | 1.00                      | 0.59                     | 0.89                                     |
| 2               | 35      | 0.78                                                | 0.42              | 0.33                   | 0.17                    | 0.95                               | 1                                   | 1.00                                | 1.00  | 1.00                      | 0.59                     | 0.89                                     |
| 2               | 38      | 0.98                                                | 0.83              | 1.00                   | 0.17                    | 0.89                               | 1                                   | 1.00                                | 1.00  | 1.00                      | 0.86                     | 0.89                                     |
| 3               | 3       | 0.00                                                | 0.00              | 0.00                   | 0.00                    | 0.05                               | 0                                   | 0.00                                | 0.00  | 0.00                      | 0.00                     | 0.05                                     |
| 3               | 9       | 0.22                                                | 0.00              | 0.00                   | 0.00                    | 0.75                               | 0                                   | 0.67                                | 0.00  | 1.00                      | 0.00                     | 0.05                                     |
| 3               | 12      | 0.61                                                | 1.00              | 0.17                   | 0.00                    | 0.89                               | 1                                   | 1.00                                | 0.00  | 1.00                      | 0.59                     | 0.52                                     |
| 3               | 16      | 0.58                                                | 0.83              | 0.83                   | 0.67                    | 0.89                               | 1                                   | 1.00                                | 1.00  | 1.00                      | 0.91                     | 0.96                                     |
| 3               | 22      | 0.91                                                | 0.83              | 1.00                   | 1.00                    | 0.95                               | 1                                   | 1.00                                | 1.00  | 1.00                      | 0.34                     | 0.99                                     |
| 3               | 25      | 0.28                                                | 0.83              | 0.67                   | 1.00                    | 0.95                               | 1                                   | 1.00                                | 1.00  | 1.00                      | 0.00                     | 0.99                                     |
| 3               | 29      | 0.91                                                | 0.75              | 0.33                   | 0.50                    | 0.98                               | 1                                   | 1.00                                | 1.00  | 1.00                      | 0.00                     | 0.99                                     |
| 3               | 32      | 0.98                                                | 0.83              | 0.17                   | 0.17                    | 0.95                               | 1                                   | 1.00                                | 1.00  | 1.00                      | 0.34                     | 0.99                                     |
| 3               | 35      | 0.90                                                | 0.83              | 0.33                   | 0.17                    | 0.95                               | 1                                   | 1.00                                | 1.00  | 1.00                      | 0.34                     | 0.99                                     |
| 3               | 38      | 0.94                                                | 0.83              | 1.00                   | 0.17                    | 0.89                               | 1                                   | 1.00                                | 1.00  | 1.00                      | 0.59                     | 0.99                                     |
| 4               | 3       | 0.00                                                | 0.83              | 0.00                   | 0.00                    | 0.05                               | 0                                   | 0.00                                | 0.00  | 1.00                      | 0.00                     | 0.05                                     |
| 4               | 9       | 0.00                                                | 0.00              | 0.00                   | 0.00                    | 0.95                               | 0                                   | 1.00                                | 0.00  | 1.00                      | 0.00                     | 0.05                                     |
| 4               | 12      | 0.17                                                | 0.83              | 0.17                   | 0.00                    | 0.89                               | 1                                   | 1.00                                | 0.00  | 1.00                      | 0.86                     | 0.05                                     |
| 4               | 16      | 0.90                                                | 0.83              | 0.83                   | 1.00                    | 0.98                               | 1                                   | 1.00                                | 1.00  | 1.00                      | 0.99                     | 0.57                                     |
| 4               | 22      | 0.28                                                | 0.83              | 1.00                   | 1.00                    | 0.98                               | 1                                   | 1.00                                | 0.75  | 1.00                      | 0.59                     | 0.83                                     |
| 4               | 25      | 0.73                                                | 0.83              | 0.67                   | 1.00                    | 0.98                               | 1                                   | 1.00                                | 1.00  | 1.00                      | 0.00                     | 0.83                                     |
| 4               | 29      | 0.89                                                | 0.83              | 0.33                   | 0.50                    | 0.98                               | 1                                   | 1.00                                | 1.00  | 1.00                      | 0.59                     | 0.88                                     |
| 4               | 32      | 0.82                                                | 0.67              | 0.17                   | 0.17                    | 0.95                               | 1                                   | 1.00                                | 1.00  | 1.00                      | 0.74                     | 0.88                                     |
| 4               | 35      | 0.47                                                | 0.63              | 0.33                   | 0.17                    | 0.89                               | 1                                   | 1.00                                | 1.00  | 1.00                      | 0.74                     | 0.88                                     |
| 4               | 38      | 0.81                                                | 0.83              | 1.00                   | 0.17                    | 0.89                               | 1                                   | 1.00                                | 1.00  | 1.00                      | 0.80                     | 0.88                                     |
| 5               | 3       | 0.75                                                | 0.00              | 0.00                   | 0.00                    | 0.05                               | 0                                   | 0.00                                | 0.00  | 1.00                      | 0.00                     | 0.05                                     |
| 5               | 9       | 0.09                                                | 0.00              | 0.00                   | 0.00                    | 0.25                               | 0                                   | 1.00                                | 0.00  | 1.00                      | 0.00                     | 0.05                                     |
| 5               | 12      | 0.69                                                | 0.83              | 0.17                   | 0.00                    | 0.25                               | 1                                   | 0.67                                | 0.00  | 1.00                      | 0.86                     | 0.05                                     |
| 5               | 16      | 1.00                                                | 0.83              | 0.83                   | 1.00                    | 0.25                               | 1                                   | 1.00                                | 1.00  | 1.00                      | 0.74                     | 0.05                                     |
| 5               | 22      | 1.00                                                | 0.79              | 1.00                   | 1.00                    | 0.55                               | 1                                   | 1.00                                | 1.00  | 1.00                      | 0.74                     | 0.85                                     |
| 5               | 25      | 0.94                                                | 0.83              | 0.67                   | 1.00                    | 0.75                               | 1                                   | 1.00                                | 1.00  | 1.00                      | 0.45                     | 0.85                                     |
| 5               | 29      | 0.45                                                | 0.54              | 0.33                   | 0.50                    | 0.89                               | 1                                   | 1.00                                | 1.00  | 1.00                      | 0.45                     | 0.96                                     |
| 5               | 32      | 0.71                                                | 0.67              | 0.17                   | 0.17                    | 0.98                               | 1                                   | 1.00                                | 1.00  | 1.00                      | 0.00                     | 0.96                                     |
| 5               | 35      | 0.96                                                | 0.71              | 0.33                   | 0.17                    | 0.98                               | 1                                   | 1.00                                | 1.00  | 1.00                      | 0.00                     | 0.96                                     |
| 5               | 38      | 0.94                                                | 0.83              | 1.00                   | 0.17                    | 0.98                               | 1                                   | 1.00                                | 1.00  | 1.00                      | 0.00                     | 0.96                                     |
| 6               | 3       | 0.00                                                | 0.00              | 0.00                   | 0.00                    | 0.05                               | 0                                   | 0.00                                | 0.00  | 0.00                      | 0.00                     | 0.05                                     |
| 6               | 9       | 0.00                                                | 0.00              | 0.00                   | 0.00                    | 0.38                               | 0                                   | 1.00                                | 0.00  | 1.00                      | 0.00                     | 0.05                                     |
| 6               | 12      | 0.47                                                | 0.67              | 0.17                   | 0.00                    | 0.55                               | 1                                   | 0.67                                | 0.00  | 1.00                      | 0.59                     | 0.05                                     |
| 6               | 16      | 0.89                                                | 1.00              | 0.83                   | 0.83                    | 0.55                               | 1                                   | 1.00                                | 1.00  | 1.00                      | 0.59                     | 0.05                                     |
| 6               | 22      | 0.87                                                | 0.83              | 1.00                   | 1.00                    | 0.55                               | 1                                   | 1.00                                | 1.00  | 1.00                      | 0.34                     | 0.60                                     |
| 6               | 25      | 0.99                                                | 0.83              | 0.67                   | 1.00                    | 0.38                               | 1                                   | 1.00                                | 1.00  | 1.00                      | 0.00                     | 0.60                                     |
| 6               | 29      | 0.99                                                | 0.71              | 0.33                   | 0.50                    | 0.75                               | 1                                   | 1.00                                | 1.00  | 1.00                      | 0.34                     | 0.73                                     |

|    |    |      |      |      |      |      |   |      |      |      |      |      |      |
|----|----|------|------|------|------|------|---|------|------|------|------|------|------|
| 6  | 32 | 0.98 | 0.83 | 0.17 | 0.17 | 0.95 | 1 | 1.00 | 1.00 | 1.00 | 1.00 | 0.34 | 0.73 |
| 6  | 35 | 0.87 | 0.83 | 0.33 | 0.17 | 0.75 | 1 | 1.00 | 1.00 | 1.00 | 1.00 | 0.34 | 0.73 |
| 6  | 38 | 0.93 | 0.83 | 1.00 | 0.17 | 0.89 | 1 | 1.00 | 1.00 | 1.00 | 1.00 | 0.00 | 0.73 |
| 7  | 3  | 0.08 | 0.00 | 0.00 | 0.00 | 0.05 | 0 | 0.00 | 0.00 | 0.00 | 1.00 | 0.00 | 0.05 |
| 7  | 9  | 0.00 | 0.00 | 0.00 | 0.00 | 0.89 | 0 | 1.00 | 0.00 | 1.00 | 1.00 | 0.00 | 0.05 |
| 7  | 12 | 0.34 | 0.67 | 0.17 | 0.00 | 0.98 | 1 | 1.00 | 0.00 | 1.00 | 1.00 | 0.89 | 0.05 |
| 7  | 16 | 1.00 | 1.00 | 0.83 | 0.67 | 0.75 | 1 | 1.00 | 1.00 | 1.00 | 1.00 | 1.00 | 0.87 |
| 7  | 22 | 0.87 | 1.00 | 1.00 | 1.00 | 0.95 | 1 | 1.00 | 1.00 | 1.00 | 1.00 | 0.69 | 0.92 |
| 7  | 25 | 0.61 | 0.83 | 0.67 | 1.00 | 0.75 | 1 | 0.67 | 1.00 | 1.00 | 1.00 | 0.00 | 0.96 |
| 7  | 29 | 0.78 | 0.67 | 0.33 | 0.50 | 0.75 | 1 | 1.00 | 1.00 | 1.00 | 1.00 | 0.00 | 0.96 |
| 7  | 32 | 0.94 | 0.83 | 0.17 | 0.17 | 1.00 | 1 | 1.00 | 1.00 | 1.00 | 1.00 | 0.00 | 0.96 |
| 7  | 35 | 0.83 | 0.83 | 0.33 | 0.17 | 0.99 | 1 | 1.00 | 1.00 | 1.00 | 1.00 | 0.00 | 0.96 |
| 7  | 38 | 0.69 | 0.83 | 1.00 | 0.17 | 0.98 | 1 | 1.00 | 1.00 | 1.00 | 1.00 | 0.00 | 0.96 |
| 8  | 3  | 0.12 | 0.00 | 0.00 | 0.00 | 0.05 | 0 | 0.00 | 0.00 | 0.00 | 1.00 | 0.00 | 0.05 |
| 8  | 9  | 0.08 | 0.00 | 0.00 | 0.00 | 1.00 | 0 | 0.67 | 0.00 | 1.00 | 1.00 | 0.00 | 0.05 |
| 8  | 12 | 0.24 | 0.83 | 0.17 | 0.00 | 1.00 | 1 | 1.00 | 0.00 | 1.00 | 1.00 | 0.00 | 0.05 |
| 8  | 16 | 0.17 | 1.00 | 0.83 | 0.67 | 0.72 | 1 | 1.00 | 1.00 | 1.00 | 1.00 | 0.96 | 0.65 |
| 8  | 22 | 0.24 | 1.00 | 1.00 | 1.00 | 0.99 | 1 | 1.00 | 1.00 | 1.00 | 1.00 | 0.45 | 0.67 |
| 8  | 25 | 0.10 | 0.83 | 0.67 | 1.00 | 0.69 | 1 | 1.00 | 1.00 | 1.00 | 1.00 | 0.45 | 0.67 |
| 8  | 29 | 0.07 | 0.75 | 0.33 | 0.50 | 1.00 | 1 | 1.00 | 1.00 | 1.00 | 1.00 | 0.00 | 0.67 |
| 8  | 32 | 0.36 | 0.83 | 0.17 | 0.17 | 1.00 | 1 | 0.67 | 1.00 | 1.00 | 1.00 | 0.34 | 0.67 |
| 8  | 35 | 0.35 | 0.75 | 0.33 | 0.17 | 0.96 | 1 | 1.00 | 1.00 | 1.00 | 1.00 | 0.34 | 0.67 |
| 8  | 38 | 0.44 | 0.83 | 1.00 | 0.17 | 0.99 | 1 | 1.00 | 1.00 | 1.00 | 1.00 | 0.59 | 0.67 |
| 9  | 3  | 0.00 | 0.00 | 0.00 | 0.00 | 0.05 | 0 | 0.00 | 0.00 | 0.00 | 0.00 | 0.00 | 0.05 |
| 9  | 9  | 0.07 | 0.00 | 0.00 | 0.00 | 0.38 | 0 | 1.00 | 0.00 | 1.00 | 1.00 | 0.00 | 0.05 |
| 9  | 12 | 0.23 | 0.83 | 0.17 | 0.00 | 0.38 | 1 | 1.00 | 0.00 | 1.00 | 1.00 | 0.00 | 0.05 |
| 9  | 16 | 0.99 | 0.83 | 0.83 | 1.00 | 0.38 | 1 | 1.00 | 1.00 | 1.00 | 1.00 | 0.00 | 0.29 |
| 9  | 22 | 1.00 | 1.00 | 1.00 | 1.00 | 0.75 | 1 | 1.00 | 1.00 | 1.00 | 1.00 | 0.59 | 0.57 |
| 9  | 25 | 1.00 | 0.83 | 0.67 | 1.00 | 0.38 | 1 | 1.00 | 1.00 | 1.00 | 1.00 | 0.59 | 0.57 |
| 9  | 29 | 1.00 | 0.50 | 0.33 | 0.50 | 0.75 | 1 | 1.00 | 1.00 | 1.00 | 1.00 | 0.59 | 0.57 |
| 9  | 32 | 1.00 | 0.54 | 0.17 | 0.17 | 0.95 | 1 | 1.00 | 1.00 | 1.00 | 1.00 | 0.00 | 0.57 |
| 9  | 35 | 0.99 | 0.67 | 0.33 | 0.17 | 0.99 | 1 | 1.00 | 1.00 | 1.00 | 1.00 | 0.00 | 0.57 |
| 9  | 38 | 1.00 | 0.83 | 1.00 | 0.17 | 0.89 | 1 | 0.89 | 1.00 | 1.00 | 1.00 | 0.00 | 0.57 |
| 10 | 3  | 0.00 | 0.00 | 0.00 | 0.00 | 0.05 | 0 | 0.00 | 0.00 | 0.00 | 1.00 | 0.00 | 0.05 |
| 10 | 9  | 0.00 | 0.00 | 0.00 | 0.00 | 0.89 | 0 | 0.33 | 0.00 | 1.00 | 1.00 | 0.00 | 0.05 |
| 10 | 12 | 0.32 | 0.83 | 0.50 | 0.00 | 0.89 | 1 | 0.33 | 1.00 | 1.00 | 1.00 | 0.80 | 0.05 |
| 10 | 16 | 0.70 | 1.00 | 0.33 | 1.00 | 0.89 | 1 | 0.78 | 1.00 | 1.00 | 1.00 | 0.83 | 0.14 |
| 10 | 22 | 0.82 | 0.96 | 0.50 | 1.00 | 0.89 | 1 | 0.67 | 1.00 | 1.00 | 1.00 | 0.74 | 0.85 |
| 10 | 25 | 0.86 | 1.00 | 0.67 | 1.00 | 0.89 | 1 | 0.67 | 1.00 | 1.00 | 1.00 | 0.59 | 0.85 |
| 10 | 29 | 1.00 | 0.67 | 0.33 | 0.50 | 0.75 | 1 | 0.50 | 1.00 | 1.00 | 1.00 | 0.80 | 0.85 |
| 10 | 32 | 1.00 | 0.67 | 0.17 | 0.17 | 0.98 | 1 | 1.00 | 1.00 | 1.00 | 1.00 | 0.94 | 0.85 |
| 10 | 35 | 0.95 | 0.75 | 0.33 | 0.17 | 0.89 | 1 | 1.00 | 1.00 | 1.00 | 1.00 | 0.94 | 0.85 |
| 10 | 38 | 0.96 | 0.83 | 1.00 | 0.17 | 0.75 | 1 | 1.00 | 1.00 | 1.00 | 1.00 | 0.97 | 0.85 |
