# Supplementary material for: Using qualitative comparative analysis and theory of change to unravel the effects of a mental health intervention on service utilisation in Nepal
Source: PubMed Central journal article supplement — BMJ Glob Health. 2018 Dec 30;3(6):e001023. doi: 10.1136/bmjgh-2018-001023 (PMC6326347; doi:10.1136/bmjgh-2018-001023), 2018-12-30
Supplement: bmjgh-2018-001023supp003.pdf [file bmjgh-2018-001023supp003.pdf]

Supplementary Table 1 Abbreviated truth table for high primary care service utilisation for mental illness.

| Medication | Condition sets    |                      |                       |             |                     | Number of cases | Outcome | Raw consistency |
|------------|-------------------|----------------------|-----------------------|-------------|---------------------|-----------------|---------|-----------------|
|            | Facility Training | Facility supervision | Community supervision | Use of CIDT | Community awareness |                 |         |                 |
| 1          | 1                 | 0                    | 0                     | 1           | 1                   | 6               | 1       | 0.99            |
| 1          | 1                 | 1                    | 0                     | 1           | 1                   | 6               | 1       | 0.97            |
| 1          | 1                 | 1                    | 0                     | 0           | 1                   | 4               | 1       | 0.97            |
| 1          | 1                 | 0                    | 0                     | 0           | 1                   | 14              | 1       | 0.93            |
| 1          | 1                 | 1                    | 1                     | 0           | 1                   | 10              | 1       | 0.91            |
| 1          | 1                 | 1                    | 1                     | 1           | 1                   | 13              | 1       | 0.89            |
| 1          | 1                 | 0                    | 0                     | 1           | 0                   | 4               | 1       | 0.83            |
| 1          | 0                 | 0                    | 0                     | 0           | 0                   | 2               | 0       | 0.72            |
| 0          | 1                 | 0                    | 0                     | 0           | 0                   | 7               | 0       | 0.47            |
| 0          | 0                 | 0                    | 0                     | 0           | 0                   | 12              | 0       | 0.30            |

Note: Only the rows where data was available have been included and not the logical remainders

Supplementary Table 2 Abbreviated truth table low primary care service utilisation for mental illness.

| Medication | Condition sets         |                         |                            |       |          |                      |                       |             |                     | Number of cases | No outcome | Raw consistency |
|------------|------------------------|-------------------------|----------------------------|-------|----------|----------------------|-----------------------|-------------|---------------------|-----------------|------------|-----------------|
|            | Trained Facility Staff | Trained Community staff | Psychosocial interventions | MHGAP | Referral | Facility supervision | Community supervision | Use of CIDT | Community awareness |                 |            |                 |
| 0          | 1                      | 0                       | 1                          | 0     | 1        | 0                    | 0                     | 0           | 0                   | 4               | 1          | 1.00            |
| 0          | 0                      | 0                       | 1                          | 0     | 1        | 0                    | 0                     | 0           | 0                   | 3               | 1          | 1.00            |
| 0          | 1                      | 0                       | 0                          | 0     | 1        | 0                    | 0                     | 0           | 0                   | 2               | 1          | 1.00            |
| 0          | 0                      | 0                       | 0                          | 0     | 0        | 0                    | 0                     | 0           | 0                   | 4               | 1          | 0.99            |
| 1          | 1                      | 1                       | 1                          | 0     | 1        | 0                    | 0                     | 1           | 0                   | 3               | 1          | 0.96            |
| 0          | 0                      | 0                       | 0                          | 0     | 1        | 0                    | 0                     | 0           | 0                   | 5               | 1          | 0.84            |
| 1          | 1                      | 1                       | 1                          | 1     | 1        | 1                    | 1                     | 0           | 1                   | 10              | 0          | 0.47            |
| 1          | 1                      | 1                       | 1                          | 1     | 1        | 1                    | 1                     | 1           | 1                   | 13              | 0          | 0.44            |
| 1          | 1                      | 1                       | 1                          | 1     | 1        | 1                    | 0                     | 0           | 1                   | 4               | 0          | 0.40            |
| 1          | 1                      | 1                       | 1                          | 1     | 1        | 1                    | 0                     | 1           | 1                   | 6               | 0          | 0.39            |
| 1          | 1                      | 1                       | 1                          | 1     | 1        | 0                    | 0                     | 1           | 1                   | 5               | 0          | 0.38            |
| 1          | 1                      | 1                       | 1                          | 1     | 1        | 0                    | 0                     | 0           | 1                   | 14              | 0          | 0.34            |

Note: Only the rows where data was available have been included and not the logical remainders
