# Supplementary figures and images for: Using qualitative comparative analysis and theory of change to unravel the effects of a mental health intervention on service utilisation in Nepal
Source: PubMed Central journal article supplement — BMJ Glob Health. 2018 Dec 30;3(6):e001023. doi: 10.1136/bmjgh-2018-001023 (PMC6326347; doi:10.1136/bmjgh-2018-001023), 2018-12-30

# PRIME Cross Country ToC

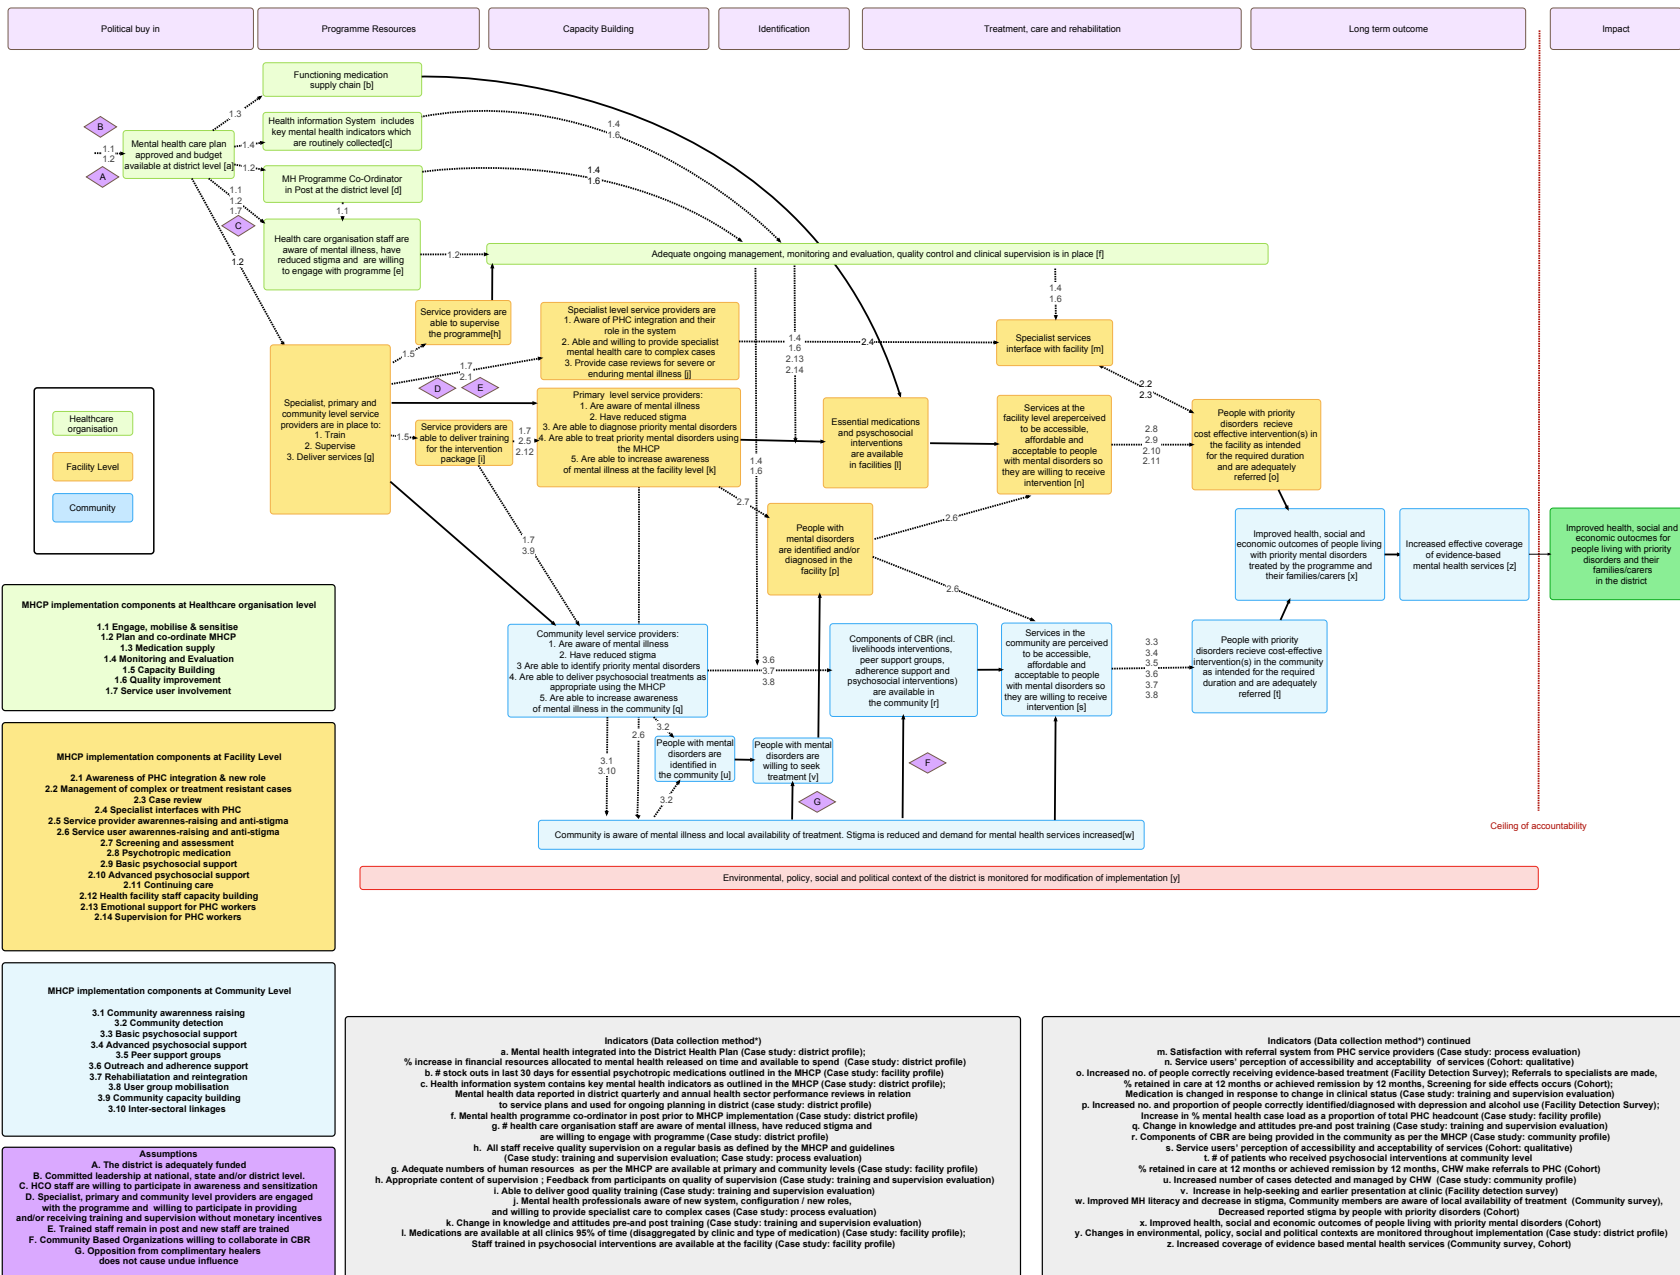

\*see De Silva et al 2014 for more details

Supplement: bmjgh-2018-001023supp001.pdf [file bmjgh-2018-001023supp001.pdf]
